# Supplementary material
Source: PubMed Central journal article supplement (PMC5296229)
Supplement: JZUSB18-0125-ESM.pdf [file JZUSB18-0125-ESM.pdf]

## Endophytes from medicinal plants and their potential for producing indole acetic acid, improving seed germination and mitigating oxidative stress

**Table S1** Location and length of 18S, 25S, 5.8S and ITS1, ITS2 sequences of various fungal strains

| Endophytes                         | Location |          |           |           |           | Length |      |      |      |     |
|------------------------------------|----------|----------|-----------|-----------|-----------|--------|------|------|------|-----|
|                                    | 18S      | ITS1     | 5.8S      | ITS2      | 28S       | 18S    | ITS1 | 5.8S | ITS2 | 28S |
| <i>A. alternata</i> (AC4)          | 1 – 27   | 28 – 189 | 190 – 348 | 349 – 506 | 507 – 564 | 27     | 162  | 159  | 158  | 58  |
| <i>Alternaria</i> sp. (RSL8.1)     | 1 – 25   | 26 – 188 | 189 – 347 | 348 – 504 | 505 – 563 | 25     | 163  | 159  | 157  | 59  |
| <i>B. sorokiniana</i> (RSL1.2)     | 1 – 37   | 38 – 212 | 213 – 369 | 370 – 541 | 542 – 597 | 37     | 175  | 157  | 172  | 56  |
| <i>C. sphaerosperumum</i> (MPB8.1) | 1 – 25   | 26 – 178 | 179 – 336 | 337 – 487 | 488 – 546 | 25     | 153  | 158  | 151  | 59  |
| <i>Phoma</i> sp. (RS-OS1.3)        | 1 – 24   | 25 – 163 | 164 – 320 | 321 – 475 | 476 – 538 | 24     | 139  | 157  | 155  | 63  |
| <i>Phoma</i> sp. (CA2)             | 1 – 30   | 31 – 168 | 169 – 325 | 326 – 480 | 481 – 544 | 30     | 138  | 157  | 155  | 64  |
| <i>Phoma</i> sp. (MPB5.2)          | 1 – 26   | 27 – 165 | 166 – 322 | 323 – 477 | 478 – 538 | 26     | 139  | 157  | 155  | 61  |
| <i>Phoma</i> sp. (MPB6.2)          | 1 – 24   | 25 – 163 | 164 – 320 | 321 – 475 | 476 – 534 | 24     | 139  | 157  | 155  | 59  |
| <i>Phoma</i> sp. (MPB6.1)          | 1 – 20   | 21 – 159 | 160 – 316 | 317 – 471 | 472 – 522 | 20     | 139  | 157  | 155  | 51  |
| <i>Phoma</i> sp. (MPS10.1)         | 1 – 27   | 28 – 166 | 167 – 323 | 324 – 478 | 479 – 540 | 27     | 139  | 157  | 155  | 62  |

**Table S2 Estimates of evolutionary divergence between sequences**

|                                     | <i>A. alternata</i><br>(AC4) | <i>Alternaria</i> sp.<br>(RSL 8.1) | <i>B. sorokiniana</i><br>(RSL 1.2) | <i>C. sphaer-</i><br><i>osperumum</i><br>(MPB 8.1) | <i>Phoma</i> sp.<br>(RS-OS 1.3) | <i>Phoma</i> sp.<br>(CA2) | <i>Phoma</i> sp.<br>(MPB 5.2) | <i>Phoma</i> sp.<br>(MPB 6.2) | <i>Phoma</i> sp.<br>(MPB 6.1) | <i>Phoma</i> sp.<br>(MPS 10.1) |
|-------------------------------------|------------------------------|------------------------------------|------------------------------------|----------------------------------------------------|---------------------------------|---------------------------|-------------------------------|-------------------------------|-------------------------------|--------------------------------|
| <i>A. alternata</i> (AC4)           |                              | 0.002                              | 0.086                              | 0.368                                              | 0.166                           | 0.166                     | 0.168                         | 0.169                         | 0.179                         | 0.168                          |
| <i>Alternaria</i> sp. (RSL 8.1)     | 0.002                        |                                    | 0.084                              | 0.365                                              | 0.168                           | 0.163                     | 0.166                         | 0.171                         | 0.182                         | 0.166                          |
| <i>B. sorokiniana</i> (RSL 1.2)     | 0.086                        | 0.084                              |                                    | 0.324                                              | 0.157                           | 0.152                     | 0.152                         | 0.154                         | 0.168                         | 0.152                          |
| <i>C. sphaerosperumum</i> (MPB 8.1) | 0.368                        | 0.365                              | 0.324                              |                                                    | 0.372                           | 0.369                     | 0.361                         | 0.363                         | 0.383                         | 0.361                          |
| <i>Phoma</i> sp. (RS-OS 1.3)        | 0.166                        | 0.168                              | 0.157                              | 0.372                                              |                                 | 0.004                     | 0.008                         | 0.008                         | 0.016                         | 0.008                          |
| <i>Phoma</i> sp. (CA2)              | 0.166                        | 0.163                              | 0.152                              | 0.369                                              | 0.004                           |                           | 0.008                         | 0.012                         | 0.020                         | 0.008                          |
| <i>Phoma</i> sp. (MPB 5.2)          | 0.168                        | 0.166                              | 0.152                              | 0.361                                              | 0.008                           | 0.008                     |                               | 0.004                         | 0.012                         | 0.000                          |
| <i>Phoma</i> sp. (MPB 6.2)          | 0.169                        | 0.171                              | 0.154                              | 0.363                                              | 0.008                           | 0.012                     | 0.004                         |                               | 0.012                         | 0.004                          |
| <i>Phoma</i> sp. (MPB 6.1)          | 0.179                        | 0.182                              | 0.168                              | 0.383                                              | 0.016                           | 0.020                     | 0.012                         | 0.012                         |                               | 0.012                          |
| <i>Phoma</i> sp. (MPS 10.1)         | 0.168                        | 0.166                              | 0.152                              | 0.361                                              | 0.008                           | 0.008                     | 0.000                         | 0.004                         | 0.012                         |                                |

The number of base substitutions per site from between sequences are shown. Analyses were conducted using the Maximum Composite Likelihood model. The analysis involved 10 nucleotide sequences. Codon positions included were 1st+2nd+3rd+Noncoding. All positions containing gaps and missing data were eliminated. There were a total of 499 positions in the final dataset. Evolutionary analyses were conducted in MEGA 5.1.

**Table S3 Sequence homology matrix of fungal strains**

|                                     | <i>A. alternata</i><br>(AC4) | <i>Alternaria</i><br>sp. (RSL 8.1) | <i>B. sorokiniana</i><br>(RS-L1.2) | <i>C. sphaer-</i><br><i>osperumum</i><br>(MPB 8.1) | <i>Phoma</i> sp.<br>(RS-OS 1.3) | <i>Phoma</i> sp.<br>(CA2) | <i>Phoma</i> sp.<br>(MPB 5.2) | <i>Phoma</i> sp.<br>(MPB 6.2) | <i>Phoma</i> sp.<br>(MPB 6.1) | <i>Phoma</i> sp.<br>(MPS 10.1) |
|-------------------------------------|------------------------------|------------------------------------|------------------------------------|----------------------------------------------------|---------------------------------|---------------------------|-------------------------------|-------------------------------|-------------------------------|--------------------------------|
| <i>A. alternata</i> (AC4)           |                              | 99                                 | 88                                 | 93                                                 | 86                              | 86                        | 86                            | 86                            | 86                            | 86                             |
| <i>Alternaria</i> sp. (RSL 8.1)     | 99                           |                                    | 86                                 | 93                                                 | 86                              | 86                        | 86                            | 86                            | 86                            | 86                             |
| <i>B. sorokiniana</i> (RS-L1.2)     | 88                           | 86                                 |                                    | 93                                                 | 85                              | 85                        | 85                            | 85                            | 84                            | 85                             |
| <i>C. sphaerosperumum</i> (MPB 8.1) | 93                           | 93                                 | 93                                 |                                                    | 93                              | 93                        | 93                            | 93                            | 93                            | 93                             |
| <i>Phoma</i> sp. (RS-OS 1.3)        | 86                           | 86                                 | 85                                 | 93                                                 |                                 | 99                        | 99                            | 99                            | 99                            | 99                             |
| <i>Phoma</i> sp. (CA2)              | 86                           | 86                                 | 85                                 | 93                                                 | 99                              |                           | 99                            | 99                            | 99                            | 99                             |
| <i>Phoma</i> sp. (MPB 5.2)          | 86                           | 86                                 | 85                                 | 93                                                 | 99                              | 99                        |                               | 99                            | 99                            | 99                             |
| <i>Phoma</i> sp. (MPB 6.2)          | 86                           | 86                                 | 85                                 | 93                                                 | 99                              | 99                        | 99                            |                               | 99                            | 99                             |
| <i>Phoma</i> sp. (MPB 6.1)          | 86                           | 86                                 | 84                                 | 93                                                 | 99                              | 99                        | 99                            | 99                            |                               | 99                             |
| <i>Phoma</i> sp. (MPS 10.1)         | 86                           | 86                                 | 85                                 | 93                                                 | 99                              | 99                        | 99                            | 99                            | 99                            |                                |
