# Supplementary material
Source: PubMed Central journal article supplement (PMC5296229)
Supplement: JZUSB18-0125-FS1.pdf [file JZUSB18-0125-FS1.pdf]

# Endophytes from medicinal plants and their potential for producing indole acetic acid, improving seed germination and mitigating oxidative stress

Fig. S1 Individual phylogenetic analysis of the 10 fungal endophytes isolated from medicinal plants

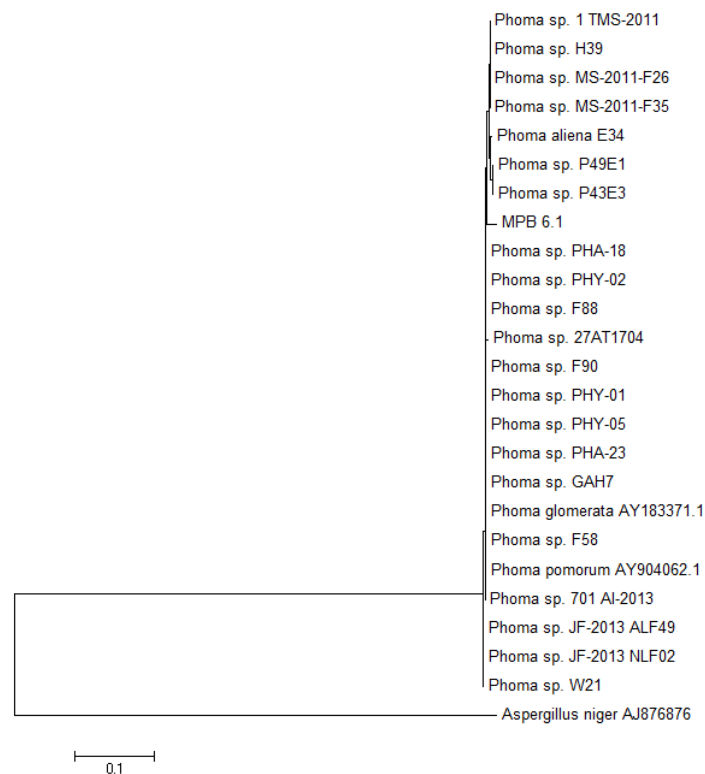

MPB6.1: Phylogenetic tree constructed by neighbor joining method using 18S rDNA sequence of MPB6.1. MPB6.1 formed a clade (100%) with *Phoma* sp. *Aspergillus niger* was taken as an out group. The tree was prepared in MEGA5.2.

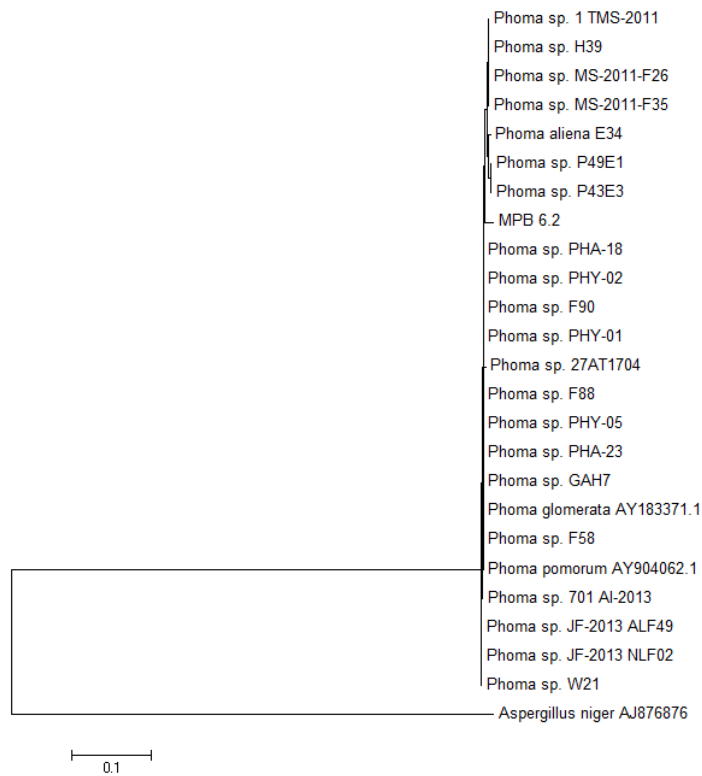

MPB 6.2: Phylogenetic tree constructed by neighbor joining method using 18S rDNA sequence of MPB6.2. MPB6.2 formed a clade (100%) with *Phoma* sp. *Aspergillus niger* was taken as an out group. The tree was prepared in MEGA5.2.

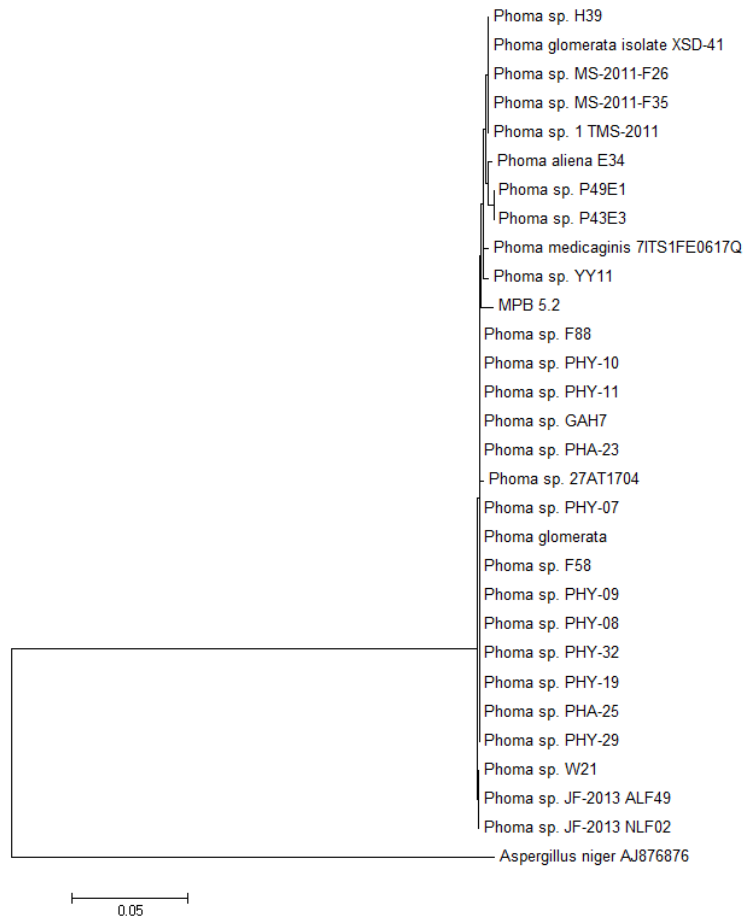

MPB 5.2: Phylogenetic tree constructed by neighbor joining method using 18S rDNA sequence of MPB5.2. MPB5.2 formed a clade (100%) with *Phoma* sp. *Aspergillus niger* was taken as an out group. The tree was prepared in MEGA5.2.

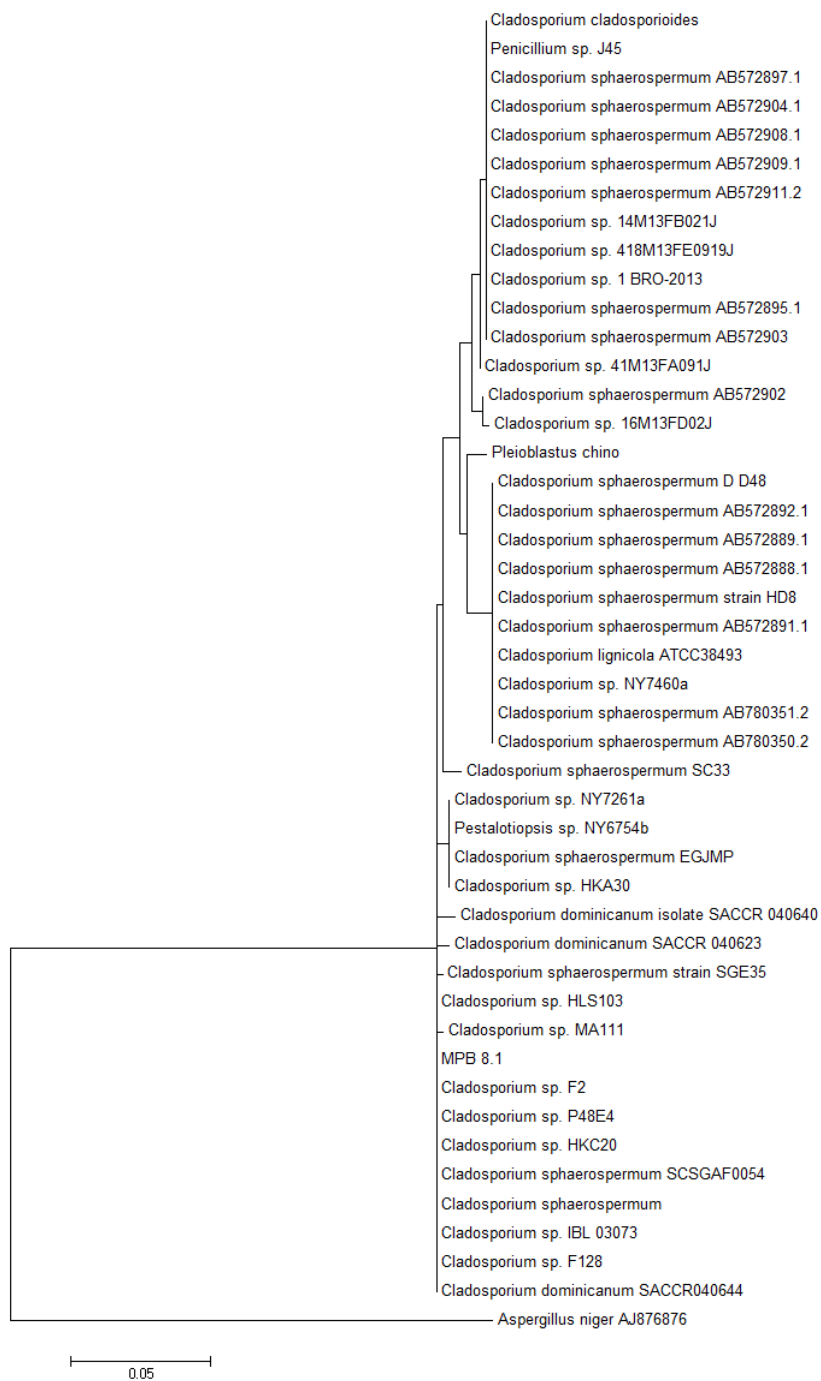

MPB 8.1: Phylogenetic tree constructed by neighbor joining method using 18S rDNA sequence of MPB8.1. MPB8.1 formed a clade (100%) with *Cladosporium*. *Aspergillus niger* was taken as an out group. The tree was prepared in MEGA5.2.

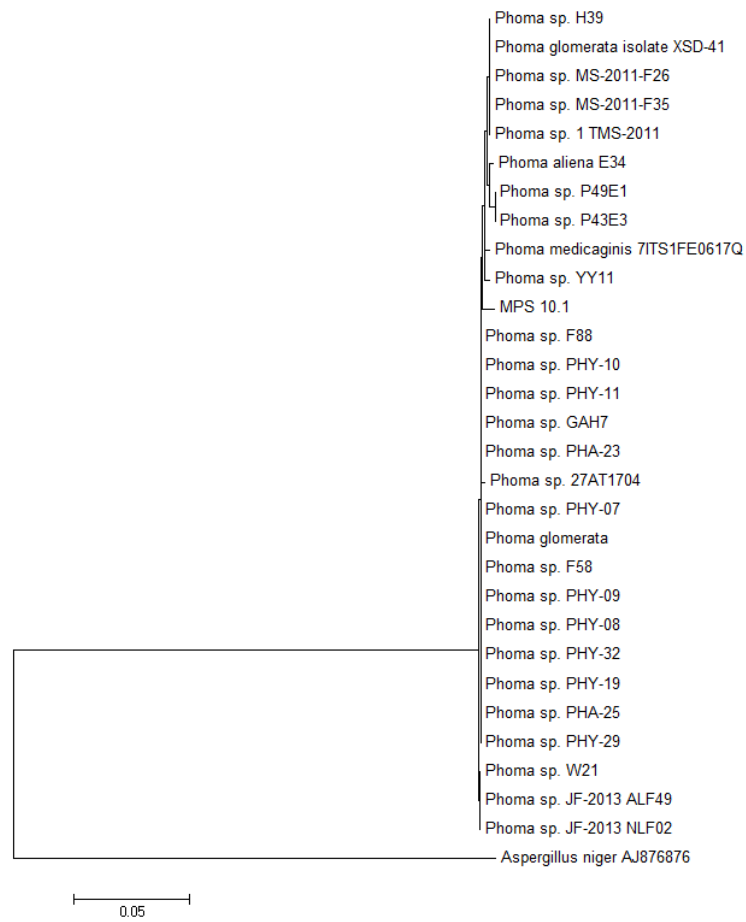

MPS 10 .1: Phylogenetic tree constructed by neighbor joining method using 18S rDNA sequence of MPB10.1. MPB10.1 formed a clade (100%) with *Phoma* sp. *Aspergillus niger* was taken as an out group. The tree was prepared in MEGA5.2.

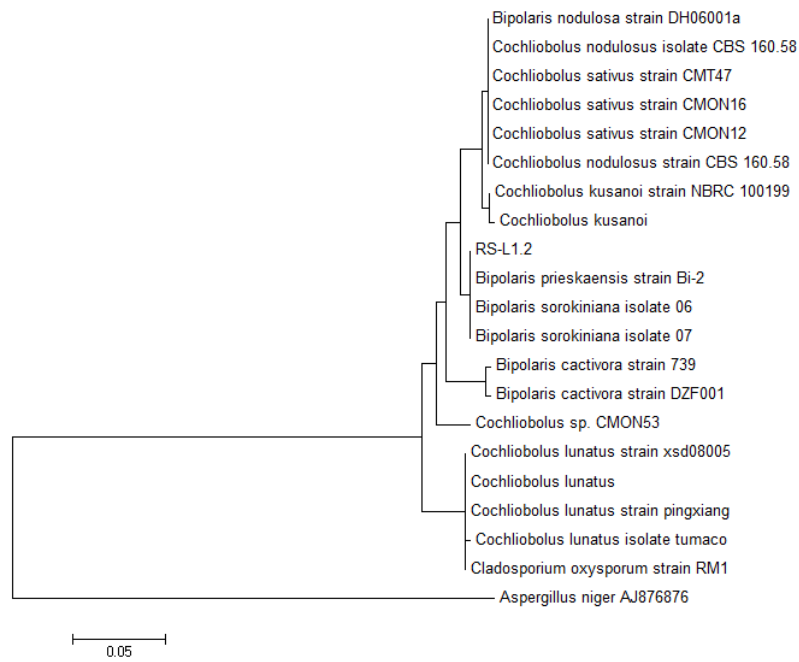

RS-L 1.2: Phylogenetic tree constructed by neighbor joining method using 18S rDNA sequence of RSL1.2. RSL1.2 formed a clade (100%) with *Bipolaris sorokiniana*. *Aspergillus niger* was taken as an out group. The tree was prepared in MEGA5.2.

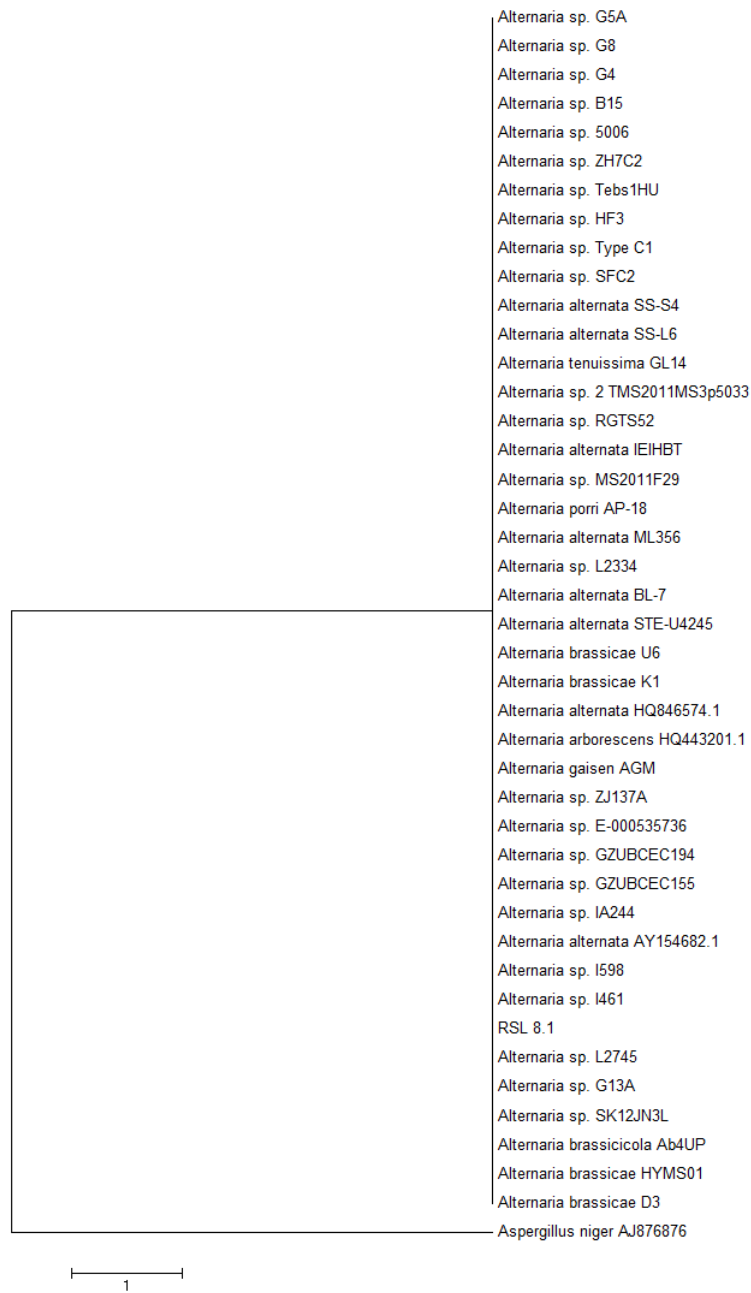

RSL 8.1: Phylogenetic tree constructed by neighbor joining method using 18S rDNA sequence of RSL8.1. RSL8.1 formed a clade (100%) with *Alternaria* sp. *Aspergillus niger* was taken as an out group. The tree was prepared in MEGA5.2.

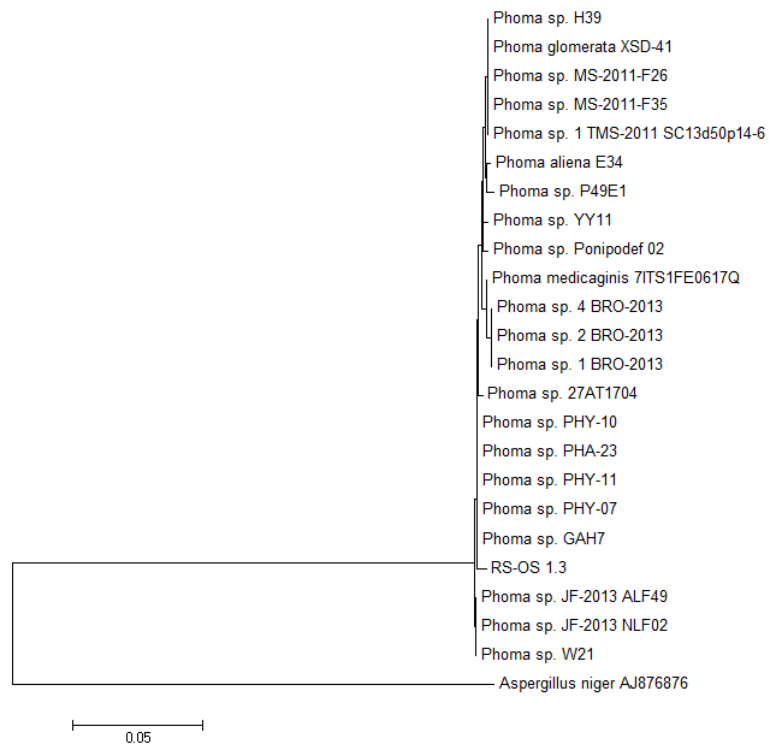

RS-OS 1.3: Phylogenetic tree constructed by neighbor joining method using 18S rDNA sequence of RS-OS1.3. RSOS1.3 formed a clade (100%) with *Phoma* sp. *Aspergillus niger* was taken as an out group. The tree was prepared in MEGA5.2.



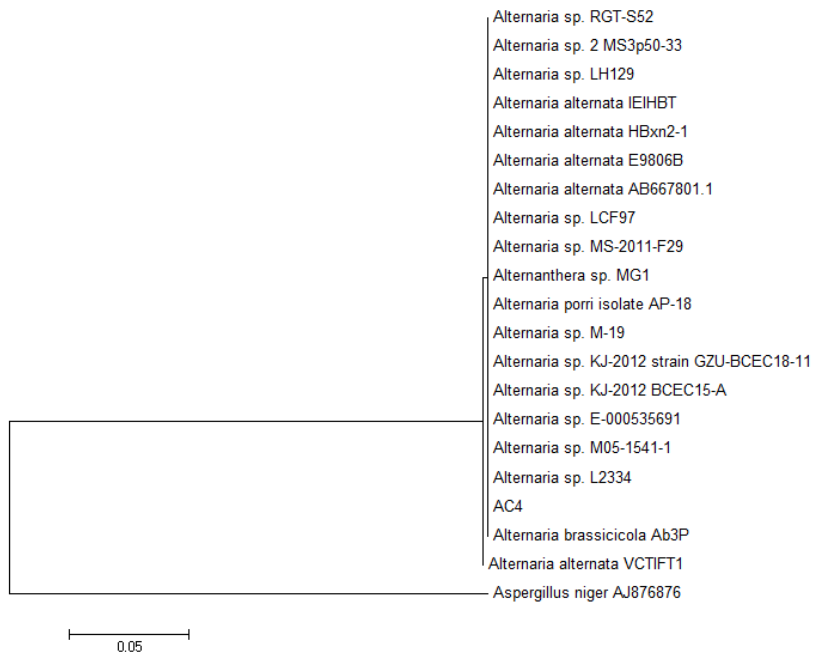

CA 4: Phylogenetic tree constructed by neighbor joining method using 18S rDNA sequence of CA4. CA4 formed a clade (100%) with *Alternaria alternata*. *Aspergillus niger* was taken as an out group. The tree was prepared in MEGA5.2.

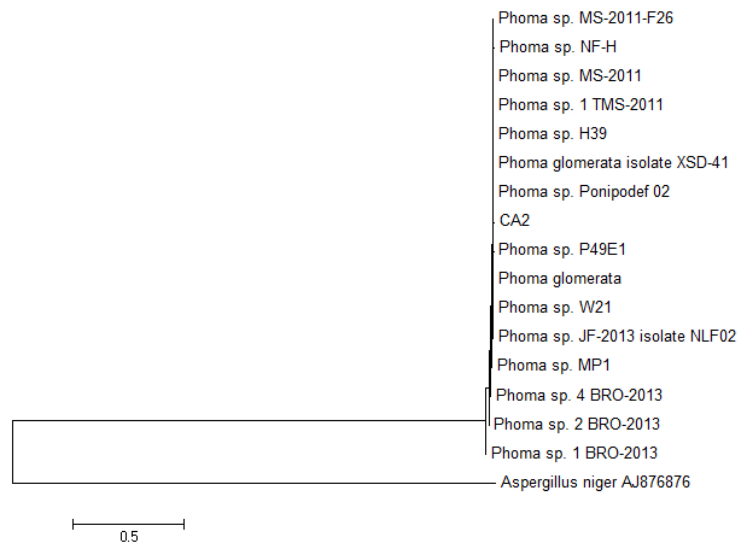

CA2: Phylogenetic tree constructed by neighbor joining method using 18S rDNA sequence of CA2. CA2 formed a clade (100%) with *Phoma sp.* *Aspergillus niger* was taken as an out group. The tree was prepared in MEGA5.2.
